# Supplementary material
Source: PubMed Central journal article supplement (PMC4136035)
Supplement: AAC.02523-13_zac008143163so1.pdf [file AAC.02523-13_zac008143163so1.pdf]

**Supplementary Table 1.** Susceptibility of isolates to  $\beta$ -lactam and non- $\beta$ -lactam antibiotics.

| Antibiotic or resistance phenotype | % of resistant isolates |
|------------------------------------|-------------------------|
| Ticarcillin                        | 100                     |
| Piperacillin                       | 91                      |
| Piperacillin-Tazobactam            | 88                      |
| Ceftazidime                        | 80                      |
| Cefepime                           | 85                      |
| Aztreonam <sup>a</sup>             | 17                      |
| Gentamicin                         | 71                      |
| Amikacin                           | 77                      |
| Tobramycin                         | 74                      |
| Ciprofloxacin                      | 71                      |
| Ofloxacin <sup>b</sup>             | 94                      |
| Meropenem                          | 86                      |
| Imipenem                           | 100                     |
| Colistin                           | 0                       |
| MDR <sup>c</sup>                   | 80                      |

<sup>a</sup> 45% of isolates had an inhibition zone between 19 and 27 mm (Intermediate category).

<sup>b</sup> the remaining 6% of isolates had an inhibition zone between 22 and 25 mm (Intermediate category)

<sup>c</sup> MDR isolates are resistant to at least three of this four antibiotics: ceftazidime, imipenem, ciprofloxacin and tobramycin (1)

## References

1. **Obritsch, M. D., D. N. Fish, R. MacLaren, and R. Jung.** 2004. National surveillance of antimicrobial resistance in *Pseudomonas aeruginosa* isolates obtained from intensive care unit patients from 1993 to 2002. *Antimicrob. Agents Chemother.* **48**:4606-4610. doi:48124606 [pii];10.1128AAC.48.12.4606-4610.2004 [doi].
